# Supplementary material
Source: publisher figshare collection journal article supplement (https://wiley.figshare.com/articles/dataset/_/3550179)
Supplement: Supplementary file 1 [file 1 › appendix-B.htm]

Ecological Archives E091-237-A2


### *Ecological Archives* E091-237-A2

### **David R. Breininger, James D. Nichols, Brean W. Duncan, Eric D. Stolen, Geoffrey M. Carter, Danny K. Hunt, and John H. Drese. 2010. Multistate modeling of habitat dynamics: factors affecting Florida scrub transition probabilities. *Ecology* 91:3354–3364.**

Appendix B. Approaches for constraining multistate capture–recapture models to estimate habitat and landscape transition probabilities.

> View / download PDF.

---


[Back to E091-237]
